# Supplementary material
Source: Springer Nature journal article supplement (https://www.springermedizin.de/resource/supplementary/12916_2011_552_MOESM7_ESM.pdf/9598126)
Supplement: MOESM7 [file 9598126]

Constant (set at 1)

$$\text{Pt1Mark}_{ij} \sim N(XB, \Omega)$$

$$\text{Pt1Mark}_{ij} = \beta_{0ij} \text{Constant} + 2.048(0.018) \text{Pt1Attempt}_{0j}$$

Slope

$$\beta_{0ij} = -4.051(0.059) + u_{0j} + e_{0ij}$$

(Attempt number - 1)  
i.e. first attempt = 0

Intercept = Mark at first attempt

$$\begin{bmatrix} u_{0j} \end{bmatrix} \sim N(0, \Omega_u) : \Omega_u = \begin{bmatrix} 110.673(0.946) \end{bmatrix}$$

Candidate level variance (differences in intercept)

$$\begin{bmatrix} e_{0ij} \end{bmatrix} \sim N(0, \Omega_e) : \Omega_e = \begin{bmatrix} 27.959(0.223) \end{bmatrix}$$

Attempt level variance (measurement error)
